# Supplementary material for: Insight into Degrading Effects of Two Fungi on Polyurethane Coating Failure in a Simulated Atmospheric Environment
Source: Polymers (Basel). 2023 Jan 9;15(2):328. doi: 10.3390/polym15020328 (PMC9866036; doi:10.3390/polym15020328)
Supplement: Supplementary file 1 [file polymers-15-00328-s001.zip › polymers-2108748-supplementary.pdf]

## Supplementary Materials

In PBD culture mediums, the *T. funiculosus* are flocculent as shown in Figure S1a, while *P. chrysosporium* exists as small spheres with 0.5–1 cm diameter and is mainly concentrated at the bottom of the liquid environment (Figure S1b).

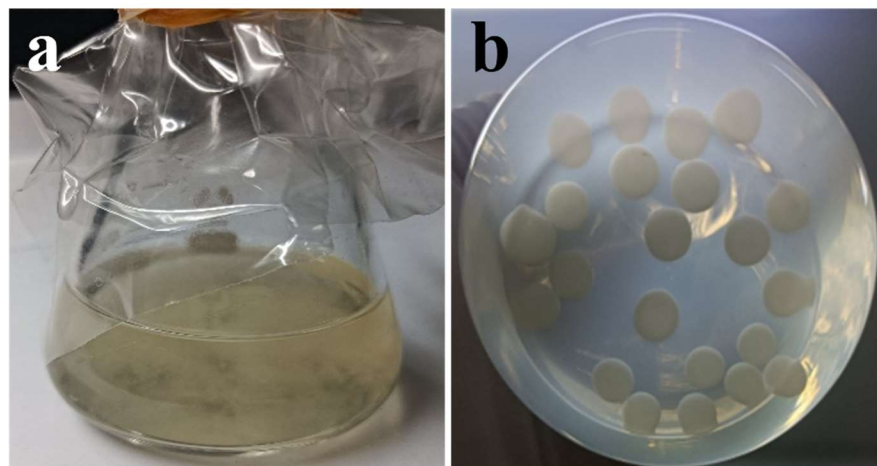

**Figure S1.** Characterization of *T. funiculosus* (a) and *P. chrysosporium* (b) in PDB culture medium after 7 days.

**Table S1.** Chromatographic condition.

| Reagent                | Content                                                    |
|------------------------|------------------------------------------------------------|
| chromatographic column | ultimate AQ-C18 4.6×250 mm 5 $\mu$ m                       |
| mobile phase           | 20 mM Disodium hydrogen phosphate(pH 2.7) - methanol =99-1 |
| flow velocity          | 0.7 mL/min                                                 |
| column temperature     | 30 $^{\circ}$ C                                            |
| detection wavelength   | 210 nm                                                     |
| injection quantity     | 10 $\mu$ L                                                 |

**Table S2.** The peak time of organic acids in the HPLC spectrum.

| No. | Organic Acid   | Time (min) |
|-----|----------------|------------|
| 1   | oxalic acid    | 4.446      |
| 2   | Tartaric acid  | 4.979      |
| 3   | methanoic acid | 5.405      |
| 4   | Malic acid     | 6.227      |
| 5   | malonic acid   | 6.433      |
| 6   | lactic acid    | 7.450      |
| 7   | acetic acid    | 7.993      |
| 8   | citric acid    | 10.054     |
| 9   | succinic acid  | 12.479     |
| 10  | propanoic acid | 18.181     |

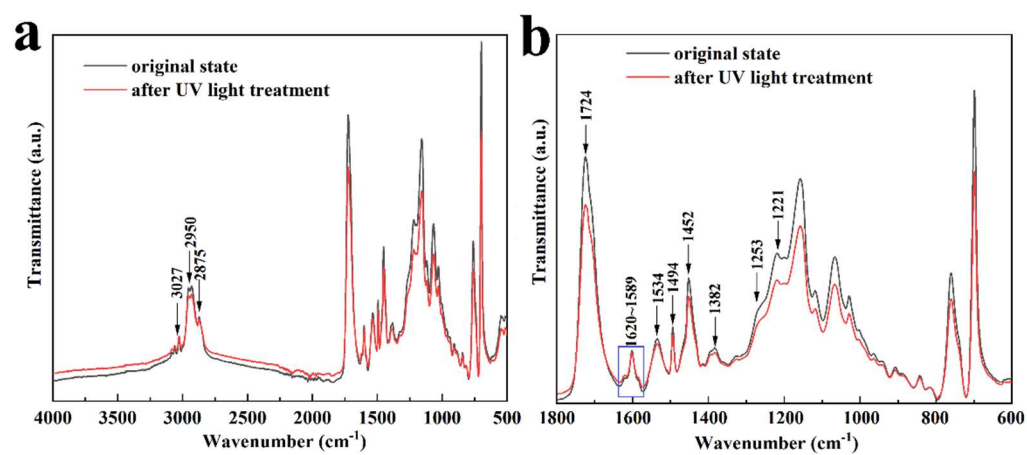

**Figure S2.** The FTIR spectra of intact PU coatings with and without treatment by UV light for 30 min. Wavenumber range of from spectrum 4000~500  $\text{cm}^{-1}$  (a); from 1800~600  $\text{cm}^{-1}$ .

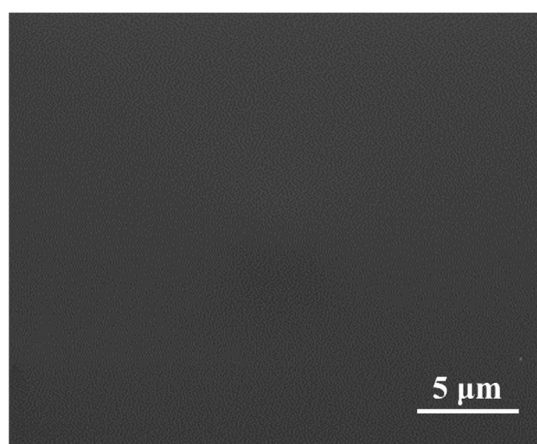

**Figure S3.** The SEM image of intact PU coatings at the initial state.
